# Supplementary material
Source: MDPI journal article supplement (https://www.mdpi.com/1424-2818/10/3/61)
Supplement: s1 [file s1]

Table S1 - Interview questionnaire script

| Questionnaire topic                                         | Questions                                                                                                                                                                                                                                                                                                                                                                                                                                                                                                                                                                                                                                                                                                                                                                                                                                                                                                                                                                                                                                                                                                                                                                                                                                                                                             |
|-------------------------------------------------------------|-------------------------------------------------------------------------------------------------------------------------------------------------------------------------------------------------------------------------------------------------------------------------------------------------------------------------------------------------------------------------------------------------------------------------------------------------------------------------------------------------------------------------------------------------------------------------------------------------------------------------------------------------------------------------------------------------------------------------------------------------------------------------------------------------------------------------------------------------------------------------------------------------------------------------------------------------------------------------------------------------------------------------------------------------------------------------------------------------------------------------------------------------------------------------------------------------------------------------------------------------------------------------------------------------------|
| <b>Degree of achievement and objectives of the programs</b> | <p>Do you know or remember which resources or species are monitored by the program?</p> <p>PROMUF: Fauna (); hunting (); terrestrial birds (); big cats (); others ( )</p> <p>Mamirauá System: Fishing (); Forest management ( ); agroecosystems (); others ( )</p> <p>SIMUR: Fish ( ); chelonians (); game (); agricultural products ( ); others ( )</p> <p>ProBUC: Chelonians (); census (); transit of vessels (); crocodillians () others ( )</p> <p>Do you believe that other species or resources should be monitored or only the present ones must be kept? Justify</p> <p>In your opinion, has the program worked as proposed? Why?</p>                                                                                                                                                                                                                                                                                                                                                                                                                                                                                                                                                                                                                                                       |
| <b>Time of existence of programs</b>                        | <p>Have there been interruptions in the implementation of the monitoring program? Why?</p> <p>Has financing been a problem for the maintenance of the program throughout its existence? Justify.</p> <p>Changes in technical team influenced program operation? Why?</p> <p>What resources or species were best monitored over monitoring program lifetime?</p>                                                                                                                                                                                                                                                                                                                                                                                                                                                                                                                                                                                                                                                                                                                                                                                                                                                                                                                                       |
| <b>Access to program results</b>                            | <p>What treatment do data obtained receive until they are made available to users?</p> <p>How program information is generated?</p> <p>What is the access policy to the program data?</p> <p>Who are the social actors who have used program data most and with what purposes?</p> <p>How do program information reach community members?</p> <p>Do community members trust the information generated by the program? Justify.</p> <p>Yes No ( )</p>                                                                                                                                                                                                                                                                                                                                                                                                                                                                                                                                                                                                                                                                                                                                                                                                                                                  |
| <b>Community participation</b>                              | <p>Which actors participated in the construction of the monitoring program? Users within the UC - Yes () No (); Non-UC Users - Yes () No (); Union of rural workers - Yes () No (); City Hall - Yes () No (); State government office - Yes () No (); CU Manager- Yes () No (); Monitoring program technicians - Yes () No (); Researchers from university or research institute- Yes () No (); Other - Yes () No ( )</p> <p>Was there a community participation in the following steps?</p> <p>a) Elaboration of the proposal - Decision on the scope of the program - No () Not satisfactory () Satisfactory (); Decision of resources and species to be monitored - No () Not satisfactory () Satisfactory () Justify. Criteria for choosing the monitors - No () Not satisfactory () Satisfactory () Justify.</p> <p>b) Implementation of the program - Choice of monitors - No () Unsatisfactory () Satisfactory () Justify. Choice of interviewed users - No () Unsatisfactory () Satisfactory () Justify. Definition of interview days- No () Unsatisfactory () Satisfactory () Justify. Definition of the days of data collection - No () Not satisfactory () Satisfactory () Justify. Definition of the content of the questionnaires - No () Unsatisfactory () Satisfactory () Justify.</p> |
| <b>Weaknesses and Threats</b>                               | <p>Which of the following aspects: Acceptance and mobilization in communities; Communication; Infrastructure; Resources and materials for monitors;</p> <p>Could be mentioned as well achieved by the program? Justify.</p> <p>Could be improved for a more satisfactory operation of the program? Justify.</p> <p>Present difficulty (s) in the program whose overcoming depends only on its participants? Justify.</p> <p>Could be facilitated if put as part of the management of the CU?</p>                                                                                                                                                                                                                                                                                                                                                                                                                                                                                                                                                                                                                                                                                                                                                                                                      |
